# Supplementary material for: Defect mechanism of the BixSb2−xTe3 alloy catalyst for lithium–oxygen battery applications
Source: Royal Society of Chemistry journal article supplement (doi:10.1039/d4tc05069j), 2025-01-01
Supplement: d4tc05069j1.pdf [file d4tc05069j1.pdf]

## Defect mechanism of $\text{Bi}_x\text{Sb}_{2-x}\text{Te}_3$ alloy catalyst for lithium-oxygen battery applications

Songyan Liu,<sup>a</sup> Xujie Song,<sup>a</sup> Jianhua Zhou,<sup>\*a</sup> Jie Gao,<sup>a</sup> Haiqing Qin,<sup>b</sup> Xiaoyang Wang,<sup>c</sup>  
Jun-Liang Chen,<sup>a</sup> Wenping Liu,<sup>a</sup> Xiaoxu Lei<sup>b</sup> and Lei Miao<sup>\*c</sup>

### Supporting Information

**Table S1.** Raw material addition amount for preparing  $\text{Bi}_x\text{Sb}_{2-x}\text{Te}_3$  alloy materials with  
different proportions

| Sample                                      | $\text{BiCl}_3/\text{g}$ | $\text{SbCl}_3/\text{g}$ | $\text{Te}/\text{g}$ |
|---------------------------------------------|--------------------------|--------------------------|----------------------|
| $\text{Bi}_2\text{Te}_3$                    | 1.2615                   |                          | 0.76637              |
| $\text{Bi}_{0.7}\text{Sb}_{1.3}\text{Te}_3$ | 0.44153                  | 0.59331                  | 0.76637              |
| $\text{Bi}_{0.6}\text{Sb}_{1.4}\text{Te}_3$ | 0.37846                  | 0.63895                  | 0.76637              |
| $\text{Bi}_{0.5}\text{Sb}_{1.5}\text{Te}_3$ | 0.31538                  | 0.68459                  | 0.76637              |
| $\text{Sb}_2\text{Te}_3$                    |                          | 0.91278                  | 0.76637              |

**Table S2.** Grain size of  $\text{Bi}_x\text{Sb}_{2-x}\text{Te}_3$  alloy material

| Sample                                                | $\Theta$ | FWHM    | D/nm     |
|-------------------------------------------------------|----------|---------|----------|
| $\text{Bi}_2\text{Te}_3$ -(0 1 5)                     | 13.83319 | 0.19524 | 43.90842 |
| $\text{Bi}_2\text{Te}_3$ -(1 0 10)                    | 18.95934 | 0.39534 | 22.25786 |
| $\text{Bi}_{0.7}\text{Sb}_{1.3}\text{Te}_3$ -(0 1 5)  | 14.01864 | 0.36757 | 23.34078 |
| $\text{Bi}_{0.7}\text{Sb}_{1.3}\text{Te}_3$ -(1 0 10) | 19.06364 | 0.39922 | 22.06014 |
| $\text{Bi}_{0.6}\text{Sb}_{1.4}\text{Te}_3$ -(0 1 5)  | 14.08573 | 0.49585 | 17.30742 |
| $\text{Bi}_{0.6}\text{Sb}_{1.4}\text{Te}_3$ -(1 0 10) | 19.13627 | 0.44761 | 19.68391 |
| $\text{Bi}_{0.5}\text{Sb}_{1.5}\text{Te}_3$ -(0 1 5)  | 14.08915 | 0.34216 | 25.08187 |
| $\text{Bi}_{0.5}\text{Sb}_{1.5}\text{Te}_3$ -(1 0 10) | 19.12763 | 0.36270 | 24.29075 |
| $\text{Sb}_2\text{Te}_3$ -(0 1 5)                     | 14.21007 | 0.16829 | 51.02268 |
| $\text{Sb}_2\text{Te}_3$ -(1 0 10)                    | 19.23834 | 0.21133 | 41.71760 |

**Table S3.** Carrier concentration, the carrier mobility of  $\text{Bi}_x\text{Sb}_{2-x}\text{Te}_3$  alloy material at 300 K

| Sample                                      | Carrier concentration<br>$10^{25}\text{m}^{-3}$ | Carrier mobility<br>$\text{cm}^2\text{V}^{-1}\text{s}^{-1}$ |
|---------------------------------------------|-------------------------------------------------|-------------------------------------------------------------|
| $\text{Bi}_2\text{Te}_3$                    | 1.48                                            | 11.3                                                        |
| $\text{Bi}_{0.7}\text{Sb}_{1.3}\text{Te}_3$ | 1.52                                            | 12.8                                                        |
| $\text{Bi}_{0.6}\text{Sb}_{1.4}\text{Te}_3$ | 1.75                                            | 18.1                                                        |
| $\text{Bi}_{0.5}\text{Sb}_{1.5}\text{Te}_3$ | 1.62                                            | 29.1                                                        |
| $\text{Sb}_2\text{Te}_3$                    | 1.60                                            | 65.8                                                        |

**Table S4.** Sample specific surface area, pore volume, and average pore size

| Sample                                      | $S_{\text{BET}}$<br>$\text{m}^2/\text{g}$ | Pore volume<br>$\text{cm}^3/\text{g}$ | Average pore size<br>nm |
|---------------------------------------------|-------------------------------------------|---------------------------------------|-------------------------|
| $\text{Bi}_2\text{Te}_3$                    | 3.3860                                    | 0.035886                              | 42.39241                |
| $\text{Bi}_{0.7}\text{Sb}_{1.3}\text{Te}_3$ | 4.9389                                    | 0.039553                              | 32.03414                |
| $\text{Bi}_{0.6}\text{Sb}_{1.4}\text{Te}_3$ | 6.5309                                    | 0.049508                              | 30.32241                |
| $\text{Bi}_{0.5}\text{Sb}_{1.5}\text{Te}_3$ | 3.1827                                    | 0.017506                              | 22.00170                |
| $\text{Sb}_2\text{Te}_3$                    | 2.8324                                    | 0.013884                              | 19.60655                |

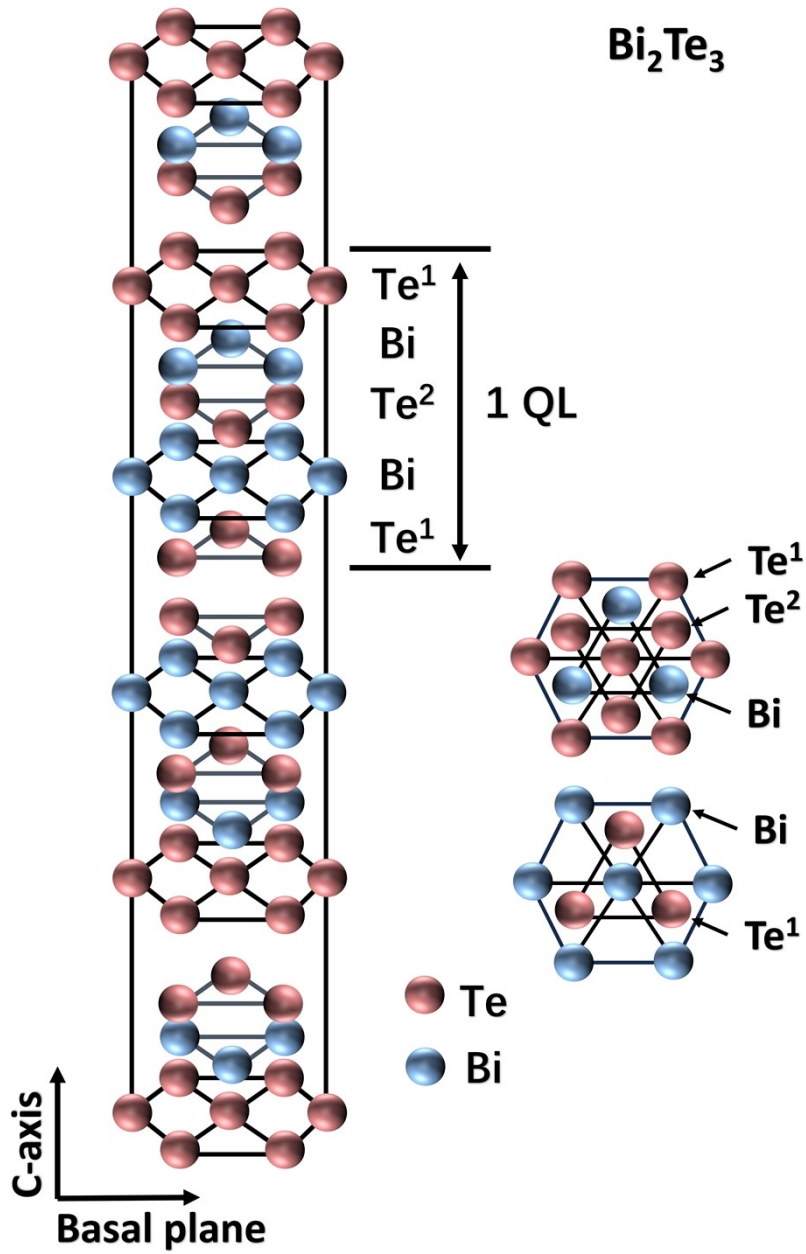

Fig. S1. Schematic cell structure of Bi<sub>2</sub>Te<sub>3</sub>

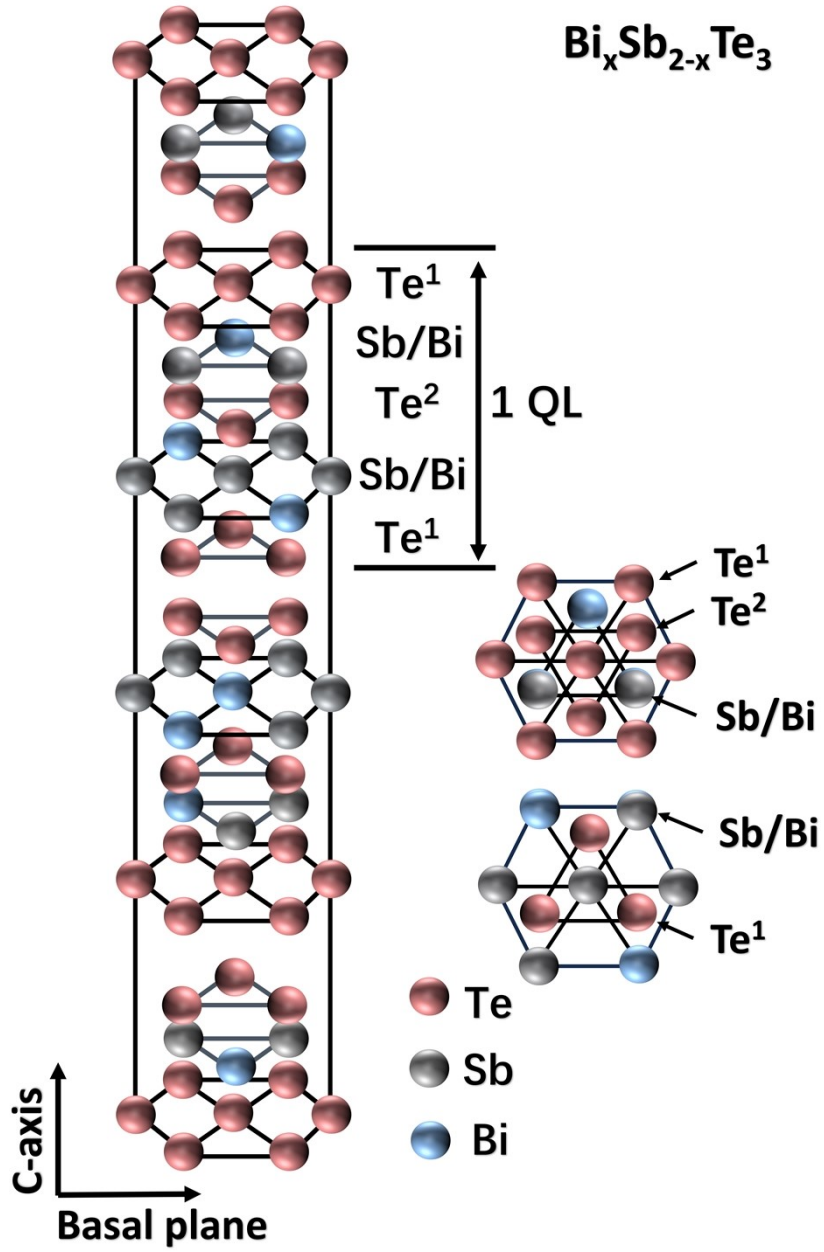

Fig. S2. Schematic cell structure of  $\text{Bi}_x\text{Sb}_{2-x}\text{Te}_3$

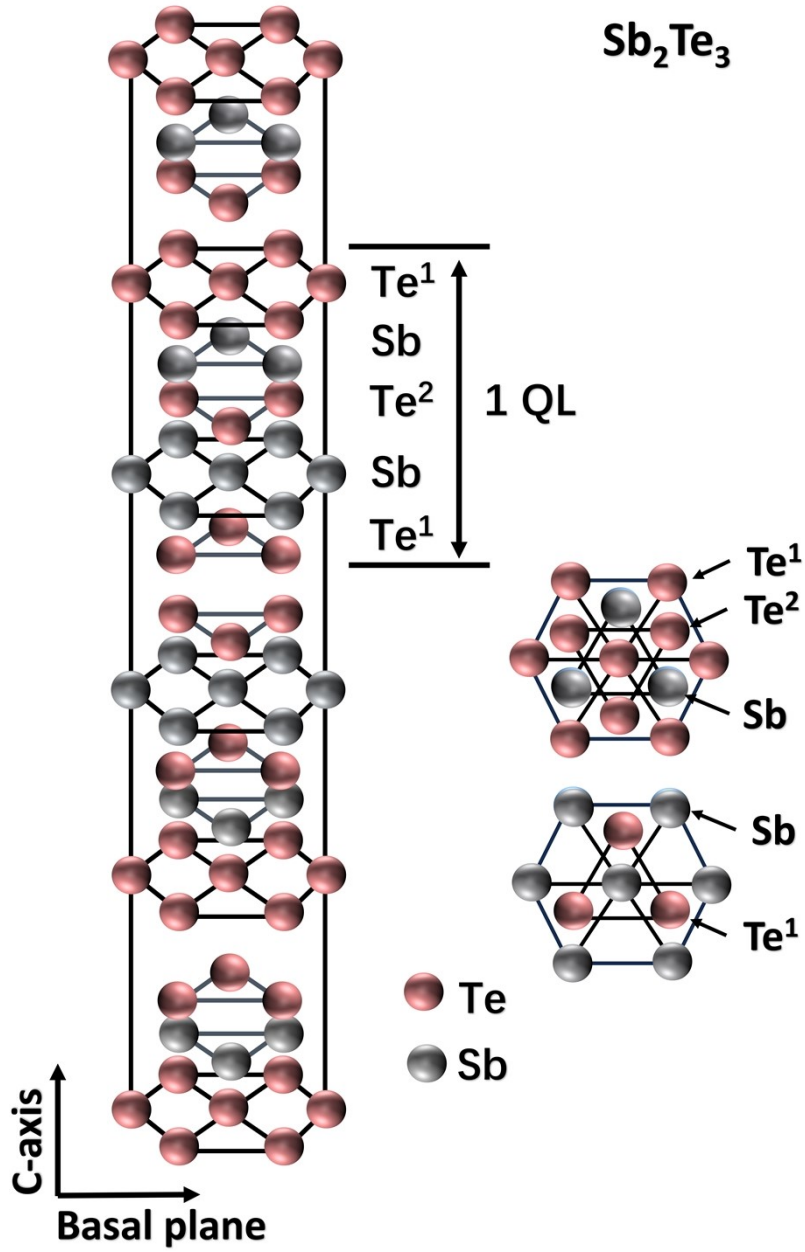

Fig. S3. Schematic cell structure of Sb<sub>2</sub>Te<sub>3</sub>

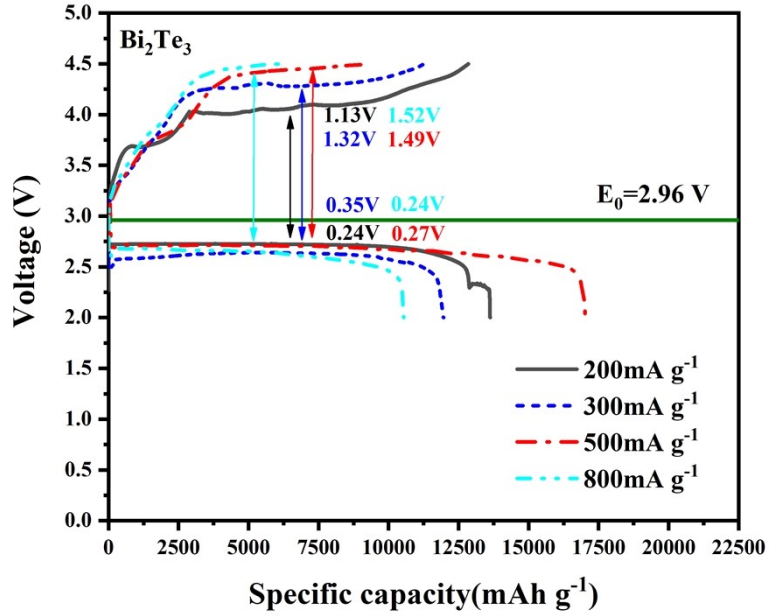

**Fig. S4.** Initial charge/discharge curves of  $\text{Bi}_2\text{Te}_3$  alloy material under different current densities

The charge-discharge specific capacities of  $\text{Bi}_2\text{Te}_3$  cathodes at 200, 300, 500, and 800  $\text{mA}\cdot\text{g}^{-1}$  current densities were demonstrated, in order, 12851.64/13623.08  $\text{mAh}\cdot\text{g}^{-1}$ , 11283.76/11964.37  $\text{mAh}\cdot\text{g}^{-1}$ , 9360.08/17020.05  $\text{mAh}\cdot\text{g}^{-1}$  and 6087.79/10537.57  $\text{mAh}\cdot\text{g}^{-1}$ , and the initial Coulombic efficiencies were 94.34%, 94.31%, 54.99% and 57.77%, in that order.



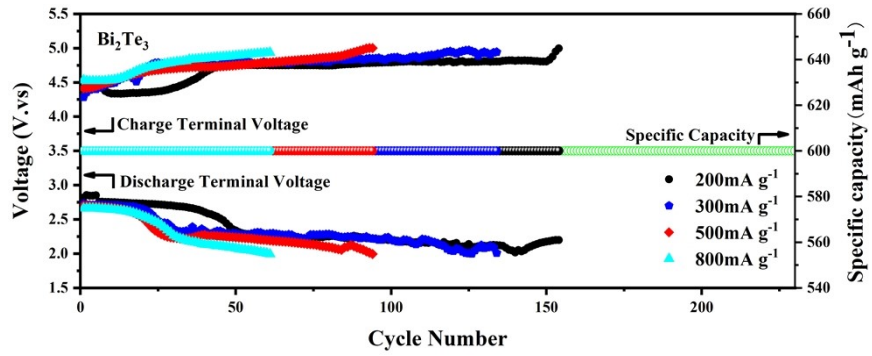

**Fig. S5.** Charge-discharge termination voltage comparison curves for  $\text{Bi}_2\text{Te}_3$  cathode at current densities of 200, 300, 500, and 800  $\text{mA}\cdot\text{g}^{-1}$  and a limited capacity of  $600\text{ mAh}\cdot\text{g}^{-1}$

The results showed that the  $\text{Bi}_2\text{Te}_3$  cathode at 200, 300, 500, and 800  $\text{mA}\cdot\text{g}^{-1}$  current densities and  $600\text{ mAh}\cdot\text{g}^{-1}$  fixed cutoff capacity had 154, 134, 94, and 61 cycles in that order.

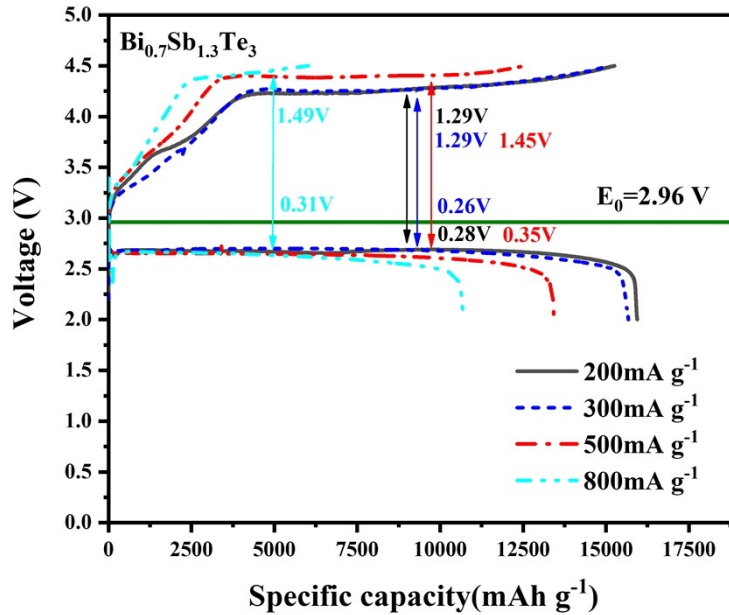

**Fig. S6.** Initial charge/discharge curves of  $\text{Bi}_{0.7}\text{Sb}_{1.3}\text{Te}_3$  alloy material under different current densities

The charge-discharge specific capacities of  $\text{Bi}_{0.7}\text{Sb}_{1.3}\text{Te}_3$  cathodes at 200, 300, 500, and 800  $\text{mA}\cdot\text{g}^{-1}$  current densities were demonstrated, in order, 15257.76/15941.22  $\text{mAh}\cdot\text{g}^{-1}$ , 15073.39/15679.30  $\text{mAh}\cdot\text{g}^{-1}$ , 12527.39/13432.57  $\text{mAh}\cdot\text{g}^{-1}$  and 6032.02/10701.03  $\text{mAh}\cdot\text{g}^{-1}$ , and the initial Coulombic efficiencies were 95.71%, 96.14%, 93.26% and 56.37%, in that order.

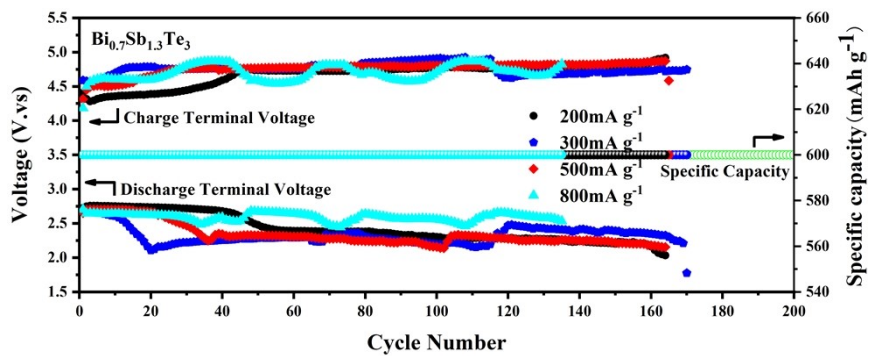

**Fig. S7.** Charge-discharge termination voltage comparison curves for  $\text{Bi}_{0.7}\text{Sb}_{1.3}\text{Te}_3$  cathode at current densities of 200, 300, 500, and 800  $\text{mA}\cdot\text{g}^{-1}$  and a limited capacity of  $600\text{ mAh}\cdot\text{g}^{-1}$

The results showed that the  $\text{Bi}_{0.7}\text{Sb}_{1.3}\text{Te}_3$  cathode at 200, 300, 500, and 800  $\text{mA}\cdot\text{g}^{-1}$  current densities and  $600\text{ mAh}\cdot\text{g}^{-1}$  fixed cutoff capacity had 164, 169, 164 and 135 cycles in that order.

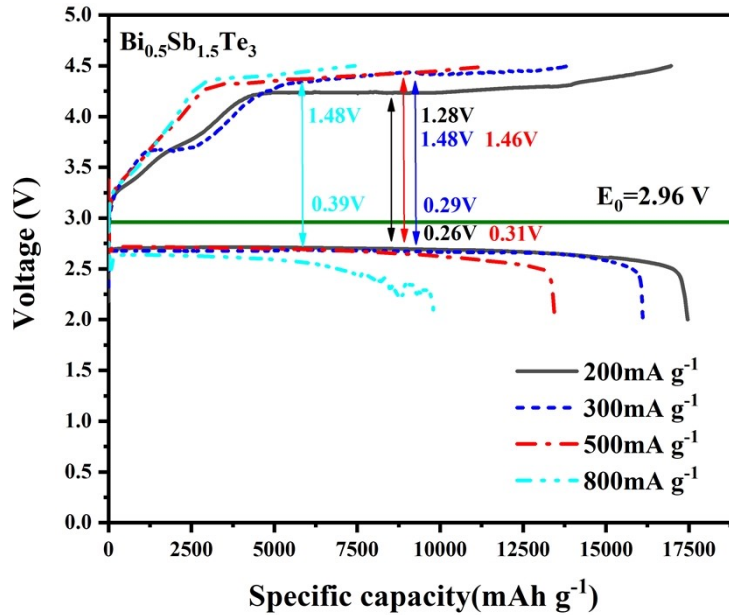

**Fig. S8.** Initial charge/discharge curves of  $\text{Bi}_{0.5}\text{Sb}_{1.5}\text{Te}_3$  alloy material under different current densities

The charge-discharge specific capacities of  $\text{Bi}_{0.5}\text{Sb}_{1.5}\text{Te}_3$  cathodes at 200, 300, 500, and 800  $\text{mA}\cdot\text{g}^{-1}$  current densities were demonstrated, in order, 16967.82/17464.59  $\text{mAh}\cdot\text{g}^{-1}$ , 13900.31/16109.27  $\text{mAh}\cdot\text{g}^{-1}$ , 11460.49/13459.38  $\text{mAh}\cdot\text{g}^{-1}$  and 7427.96/9816.18  $\text{mAh}\cdot\text{g}^{-1}$ , and the initial Coulombic efficiencies were 97.16%, 86.29%, 85.15% and 75.67%, in that order.

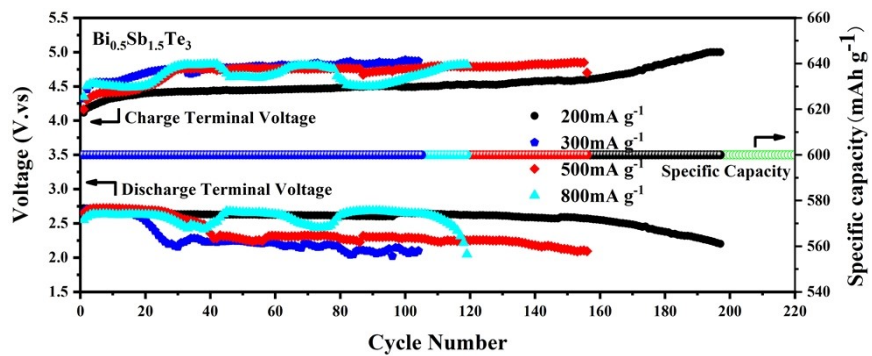

**Fig. S9.** Charge-discharge termination voltage comparison curves for  $\text{Bi}_{0.5}\text{Sb}_{1.5}\text{Te}_3$  cathode at current densities of 200, 300, 500, and 800  $\text{mA}\cdot\text{g}^{-1}$  and a limited capacity of  $600\text{ mAh}\cdot\text{g}^{-1}$

The results showed that the  $\text{Bi}_{0.5}\text{Sb}_{1.5}\text{Te}_3$  cathode at 200, 300, 500, and 800  $\text{mA}\cdot\text{g}^{-1}$  current densities and  $600\text{ mAh}\cdot\text{g}^{-1}$  fixed cutoff capacity had 197, 104, 156 and 119 cycles in that order.

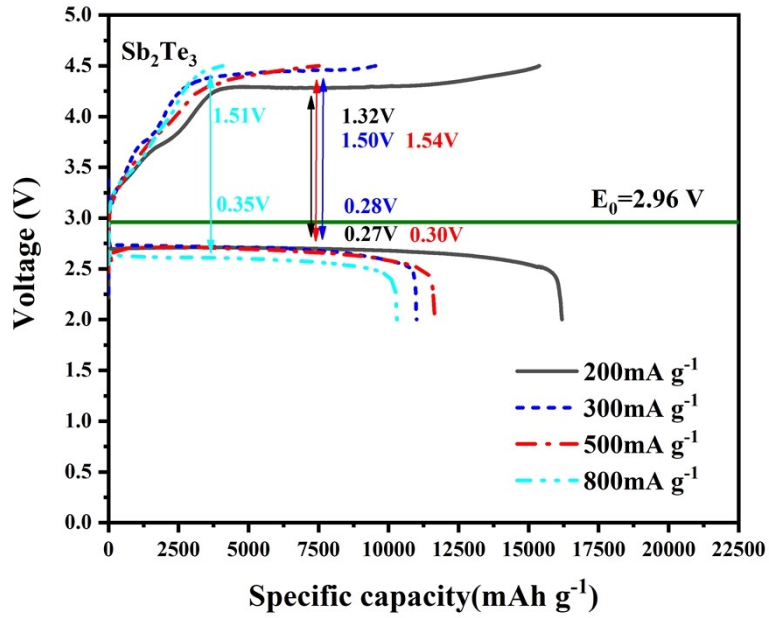

**Fig. S10.** Initial charge/discharge curves of  $\text{Sb}_2\text{Te}_3$  alloy material under different current densities

The charge-discharge specific capacities of  $\text{Sb}_2\text{Te}_3$  cathodes at 200, 300, 500, and 800  $\text{mA}\cdot\text{g}^{-1}$  current densities were demonstrated, in order, 15381.92/16191.97  $\text{mAh}\cdot\text{g}^{-1}$ , 9542.12/11005.75  $\text{mAh}\cdot\text{g}^{-1}$ , 7513.45/11663.70  $\text{mAh}\cdot\text{g}^{-1}$  and 4077.75/10300.10  $\text{mAh}\cdot\text{g}^{-1}$ , and the initial Coulombic efficiencies were 95%, 86.70%, 64.42% and 39.59%, in that order.

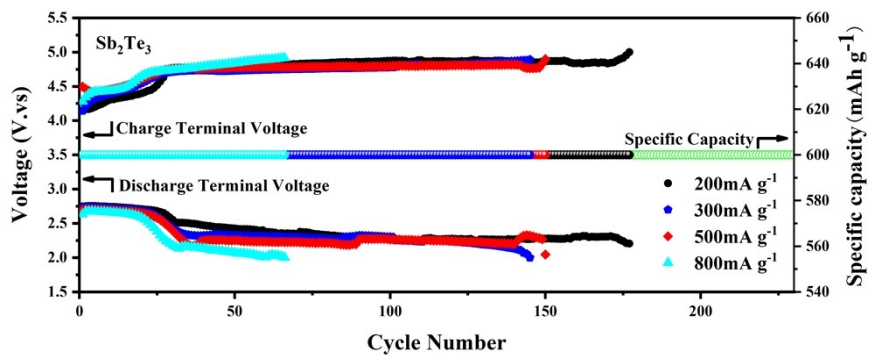

**Fig. S11.** Charge-discharge termination voltage comparison curves for  $\text{Sb}_2\text{Te}_3$  cathode at current densities of 200, 300, 500, and 800  $\text{mA}\cdot\text{g}^{-1}$  and a limited capacity of  $600\text{ mAh}\cdot\text{g}^{-1}$

The results showed that the  $\text{Sb}_2\text{Te}_3$  cathode at 200, 300, 500, and 800  $\text{mA}\cdot\text{g}^{-1}$  current densities and  $600\text{ mAh}\cdot\text{g}^{-1}$  fixed cutoff capacity had 177, 145, 150, and 66 cycles in that order.

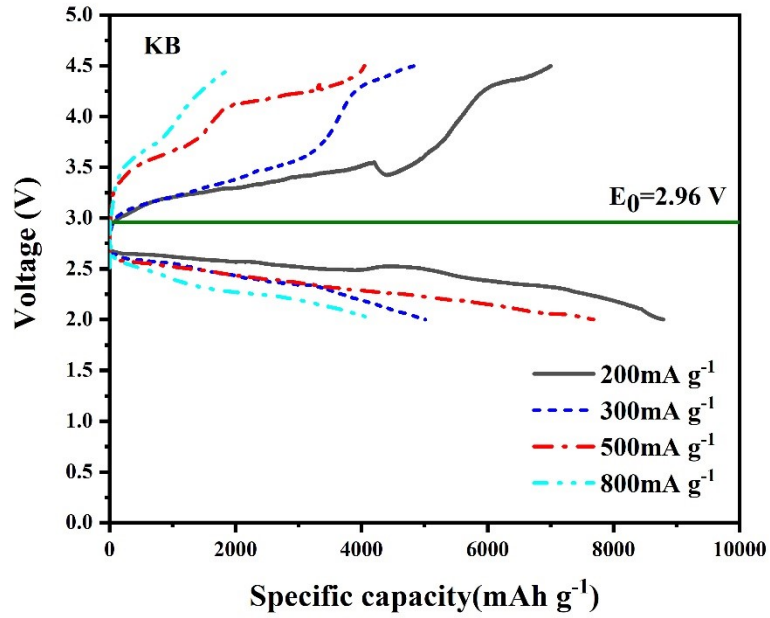

**Fig. S12.** Initial charge/discharge curves of KB alloy material under different current densities

The charge-discharge specific capacities of KB cathodes at 200, 300, 500, and 800 mA·g<sup>-1</sup> current densities were demonstrated, in order, 7006.95/8794.92 mAh·g<sup>-1</sup>, 4834.88/5015.05 mAh·g<sup>-1</sup>, 4046.15/7681.45 mAh·g<sup>-1</sup> and 1962.25/4205.83 mAh·g<sup>-1</sup>, and the initial Coulombic efficiencies were 79.67%, 96.41%, 52.67% and 46.66%, in that order.



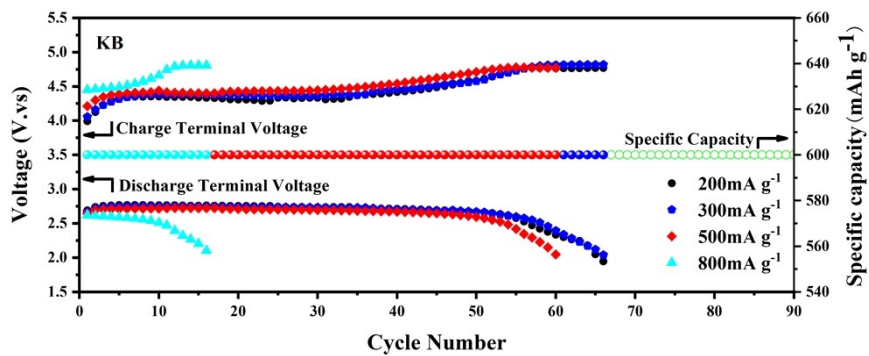

**Fig. S13.** Charge-discharge termination voltage comparison curves for KB cathode at current densities of 200, 300, 500, and 800  $\text{mA}\cdot\text{g}^{-1}$  and a limited capacity of  $600 \text{mAh}\cdot\text{g}^{-1}$

The results showed that the KB cathode at 200, 300, 500, and 800  $\text{mA}\cdot\text{g}^{-1}$  current densities and  $600 \text{mAh}\cdot\text{g}^{-1}$  fixed cutoff capacity had 66, 66, 60, and 16 cycles in that order.

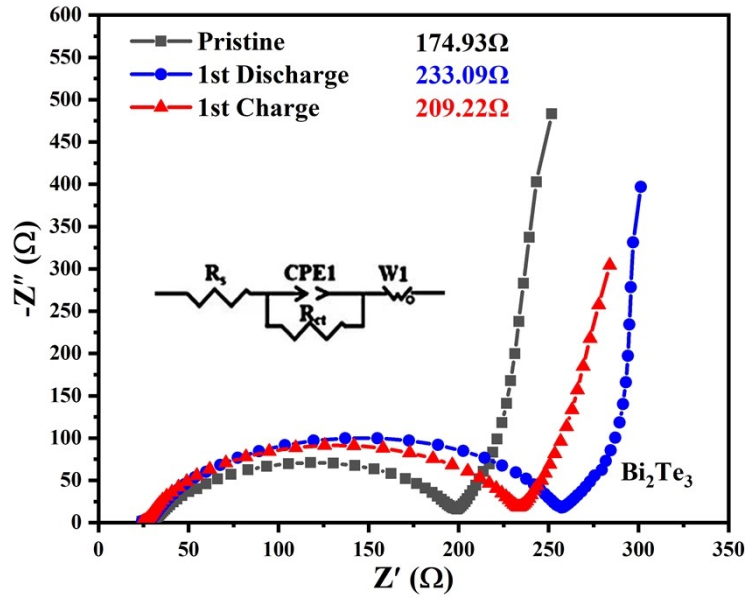

Fig. S14. Nyquist plots of  $\text{Bi}_2\text{Te}_3$  electrodes at different stages.

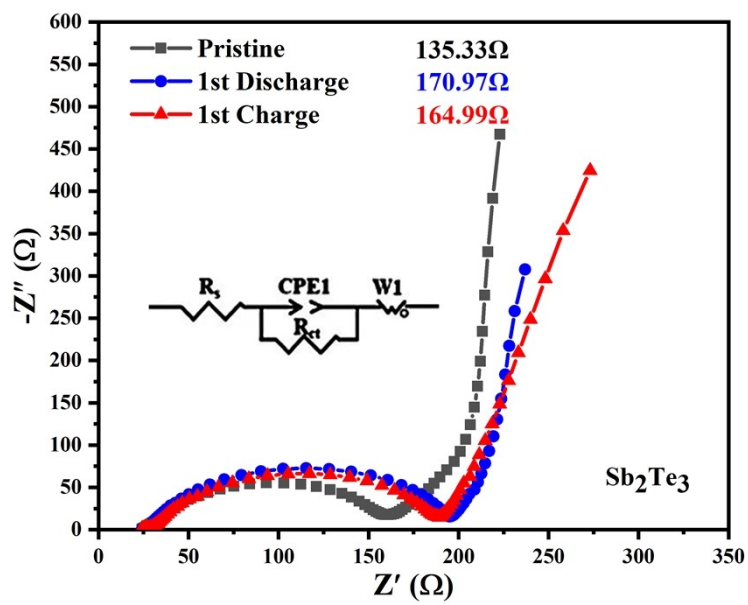

Fig. S15. Nyquist plots of  $\text{Sb}_2\text{Te}_3$  electrodes at different stages.
